# Supplementary material for: Pharmacological inhibition of LSD1 activity blocks REST-dependent medulloblastoma cell migration
Source: PubMed Central journal article supplement (PMC6145331; doi:10.1186/s12964-018-0275-5), 2018-09-18

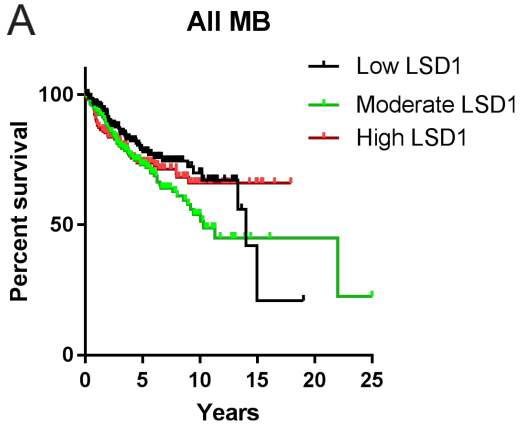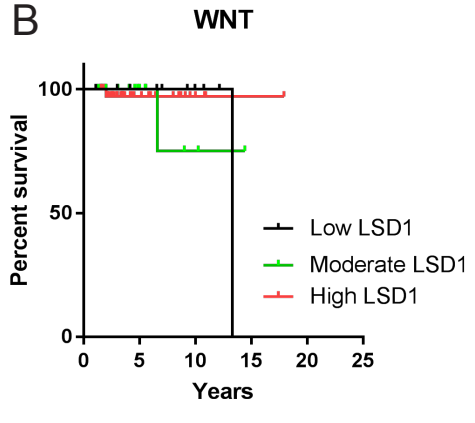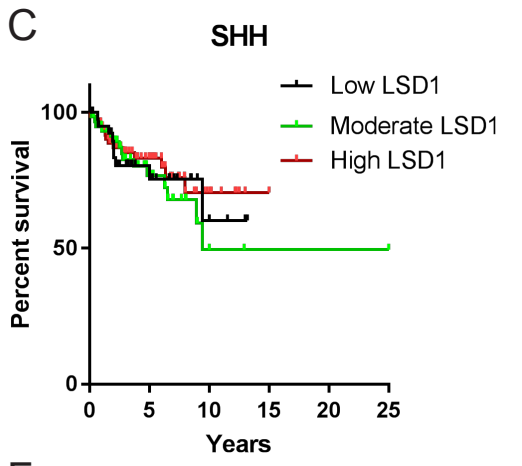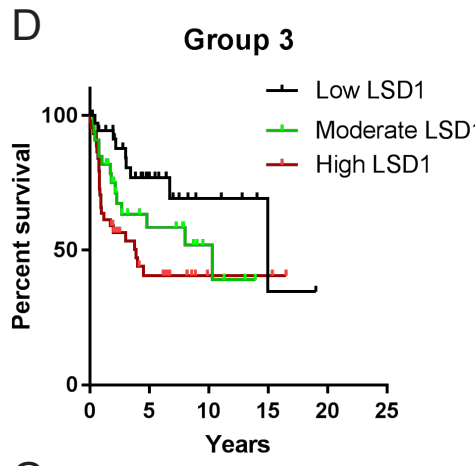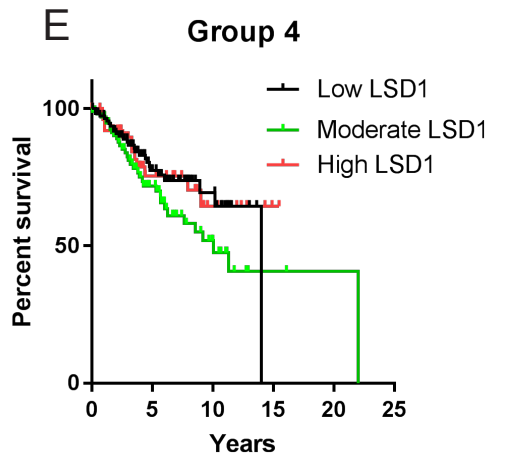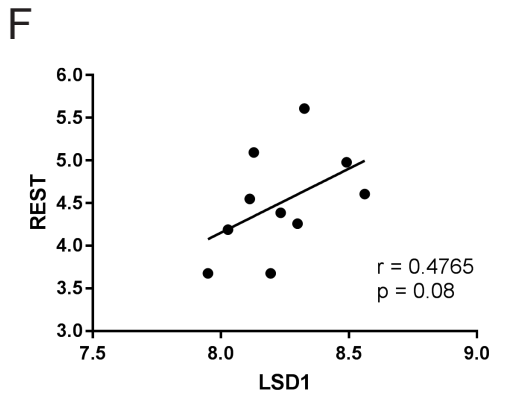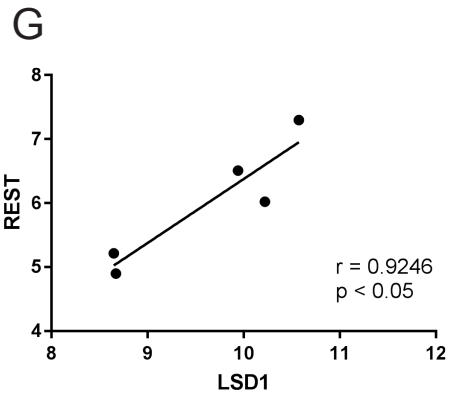

Supplement: 12964_2018_275_MOESM1_ESM.pdf [file 12964_2018_275_MOESM1_ESM.pdf]
