# Supplementary material for: Pharmacological inhibition of LSD1 activity blocks REST-dependent medulloblastoma cell migration
Source: PubMed Central journal article supplement (PMC6145331; doi:10.1186/s12964-018-0275-5), 2018-09-18

**A**

*CHRM3*  
*PTCHD2*  
*ITSN1*  
*DUSP5*  
*RBM24*  
*GREM2*  
*MYC*  
*CDK5R1*  
*TNFRSF11A*  
*ENOX2*  
*GLT8D2*  
*PTEN*  
*CACNA2D3*  
*SCN1A*  
*PTPRB*  
*DOCK9*  
*LGR6*  
*PRKG2*  
*MYB*  
*ST18*  
*MLLT11*  
*CTDP1*  
*SPP1*  
*CDK16*  
*SCN2A*  
*GRIN1*  
*NAV3*  
*CCL20*  
*SRY*  
*IL13RA2*  
*IL1R2*  
*BMP2*  
*CYB5R2*  
*KRT4*  
*ANKRD22*  
*ADAM28*  
*DAPP1*  
*DLG4*  
*TCEA2*  
*GREM1*  
*GFAP*  
*DDIT3*  
*IL1A*  
*BCL2A1*  
*NEW*  
*CXCL3*  
*POU3F1*  
*IL11*  
*STEAP3*  
*OLIG2*  
*CDKN1A*  
*CXCL2*  
*PPP1R15A*  
*ATF3*  
*FOSB*  
*EGR1*  
*FOS*  
*ZCCHC8*  
*USP37*  
*USP7*  
*KDM1A*  
*EIF2AK3*  
*ACP1*  
*TMTC3*  
*UHRF1*  
*BUB1B*  
*E2F8*  
*PXYLP1*  
*EREG*  
*TNFAIP3*  
*C8orf4*  
*TM4SF1*  
*ARHGDI3*  
*HERPUD1*  
*REST*  
*HEYL*  
*PLAUR*  
*IFI44L*  
*BST2*  
*CXCL12*  
*COL3A1*  
*CRISPLD2*  
*C8orf31*  
*UBR2*  
*SCN3A*  
*ZNF226*  
*PTGR1*  
*IL27RA*  
*STEAP1*  
*BOD1*  
*NEK3*  
*RIN1*  
*ATF4*  
*JUN*  
*SLC2A3*  
*PTX3*  
*PDGFA*  
*POU3F2*  
*CXCR4*

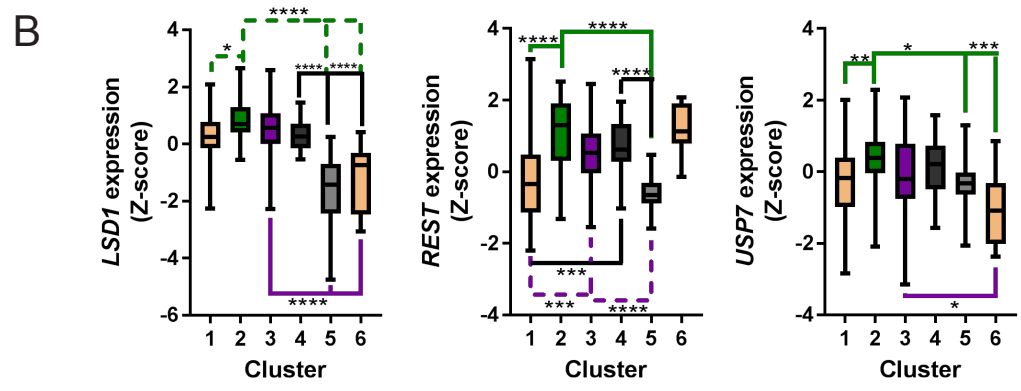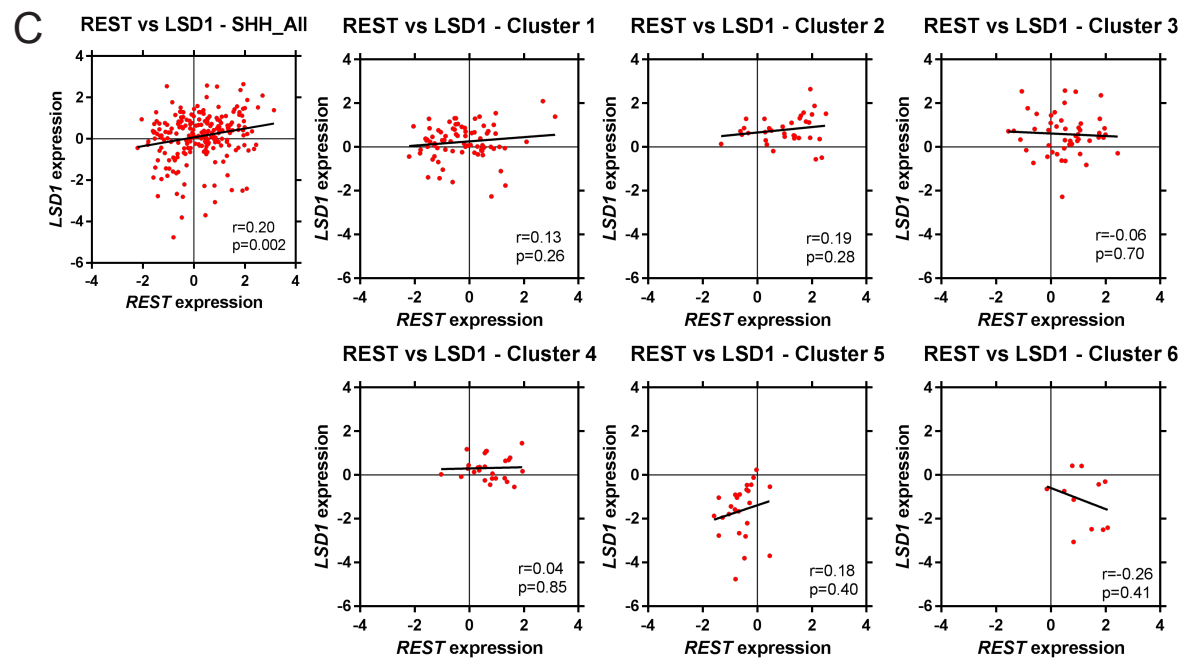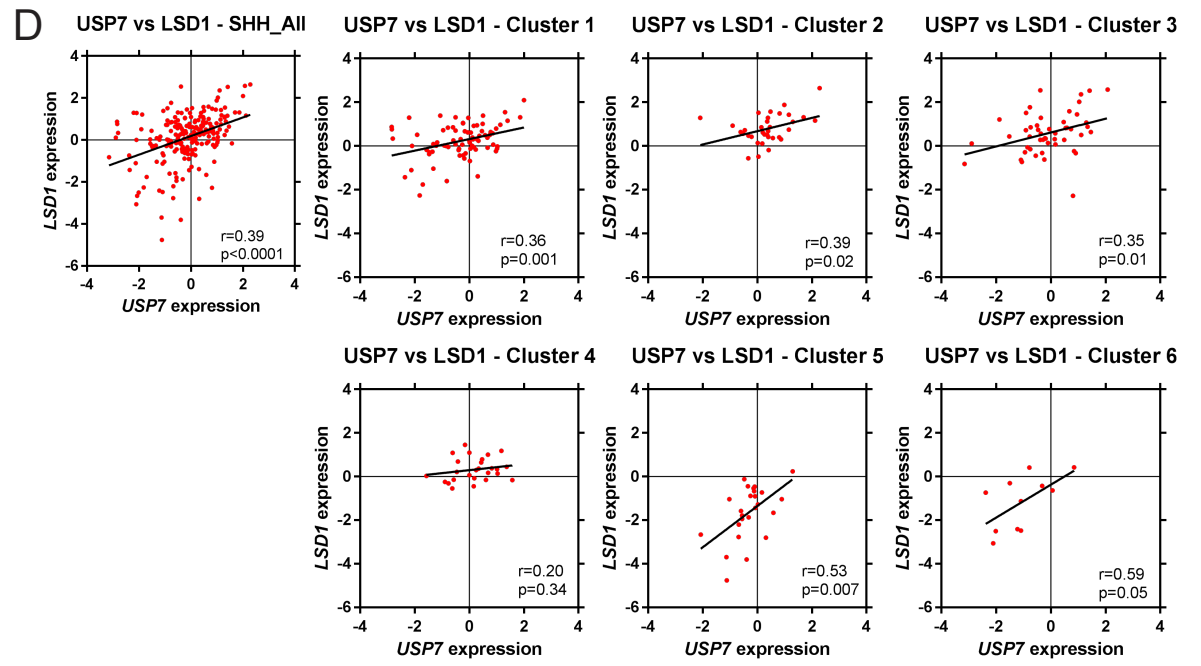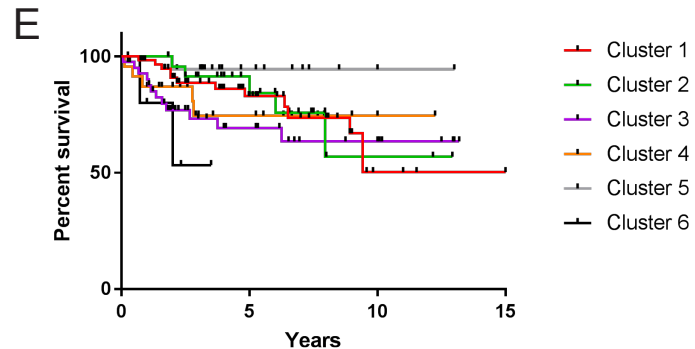

Supplement: 12964_2018_275_MOESM2_ESM.pdf [file 12964_2018_275_MOESM2_ESM.pdf]
