# Supplementary material for: Pharmacological inhibition of LSD1 activity blocks REST-dependent medulloblastoma cell migration
Source: PubMed Central journal article supplement (PMC6145331; doi:10.1186/s12964-018-0275-5), 2018-09-18
Supplement: 12964_2018_275_MOESM4_ESM.pdf [file 12964_2018_275_MOESM4_ESM.pdf]

**A****UW228**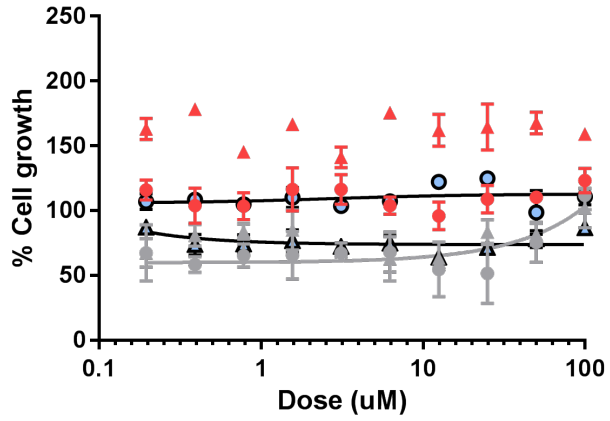**Daoy**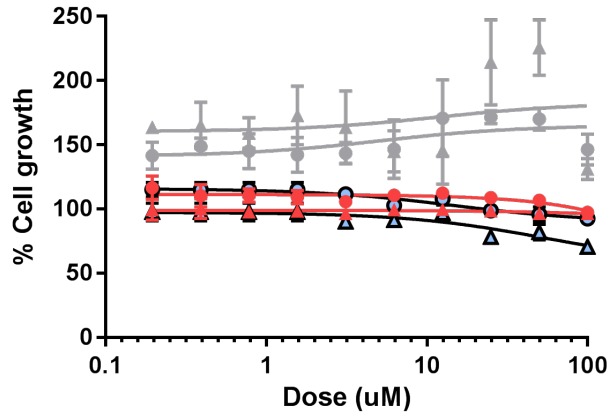**B****UW228-REST**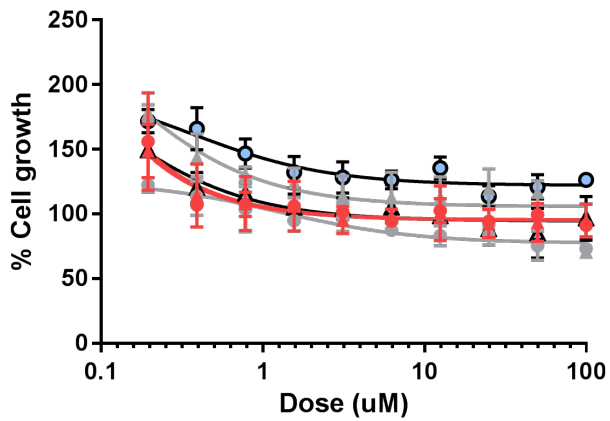**Daoy-REST**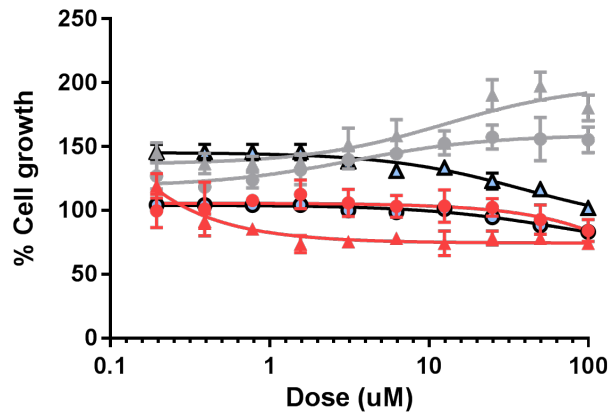

- Tranylcypromine 24 hr
- ▲ Tranylcypromine 48 hr
- GSKLSD1 24 hr
- ▲ GSKLSD1 48 hr
- GSK2789552 24 hr
- ▲ GSK2789552 48 hr
